# Supplementary material for: Good Codons, Bad Transcript: Large Reductions in Gene Expression and Fitness Arising from Synonymous Mutations in a Key Enzyme
Source: PubMed Central journal article supplement — Mol Biol Evol. 2012 Dec 4;30(3):549–60. doi: 10.1093/molbev/mss273 (PMC3563975; doi:10.1093/molbev/mss273), 2012-12-04

## SUPPLEMENTARY FIGURES

**Figure S1:** Distribution of various codon usage metrics for *M. extorquens* AM1 protein-coding genes, obtained from the codon usage bias database (<http://cub-db.cs.umt.edu/index.shtml>). Data for *fae* are indicated with a dashed blue line. Numbers in parentheses show the percentile values for *fae*, for each metric.

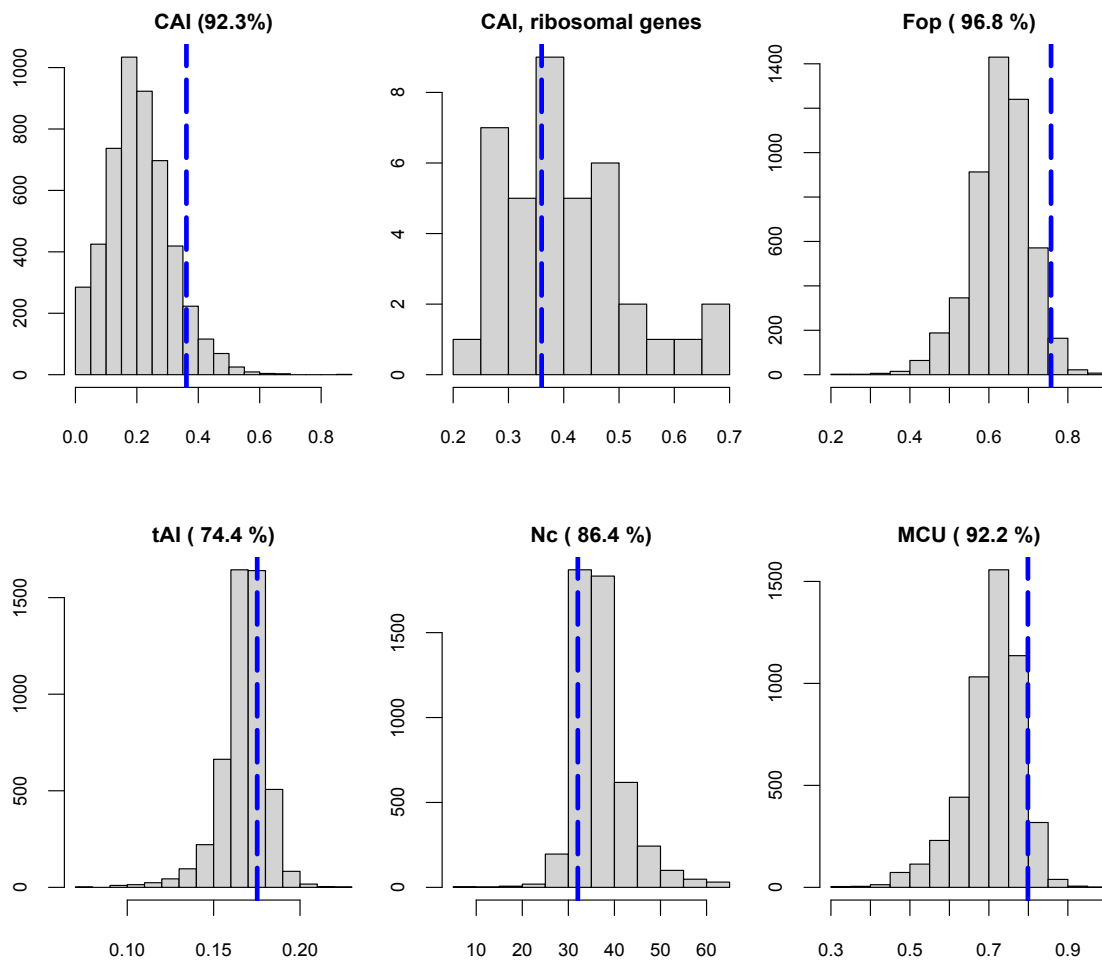

**Figure S2:** Growth rate (mean  $\pm$  2 se; n = 4) on methanol is strongly correlated with fitness during competition with fluorescently labeled wild type strain. The open triangle shows data for the wild type strain without FLAG tags (“WT\*”), and the diamond indicates the *fae* knockout (Del).

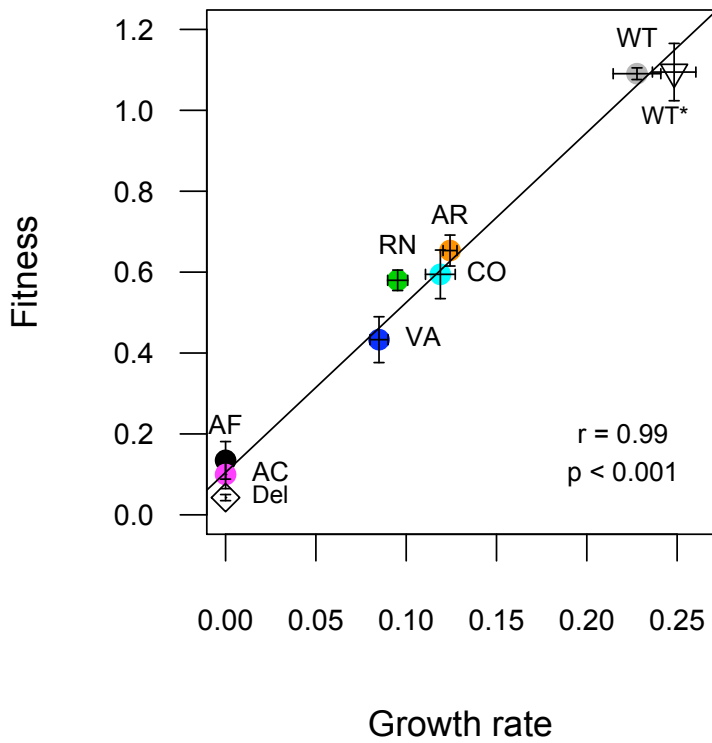

**Figure S3:** (a) Minimum folding energy for each *fae* allele calculated for 50 nt windows, starting 100 nt upstream of the start codon. Dashed lines indicate windows that overlap the start codon. (b) P values for the correlation between protein levels of each mutant and folding energy for each window. The dashed line shows the threshold p value after correcting for multiple tests using the Bonferroni correction.

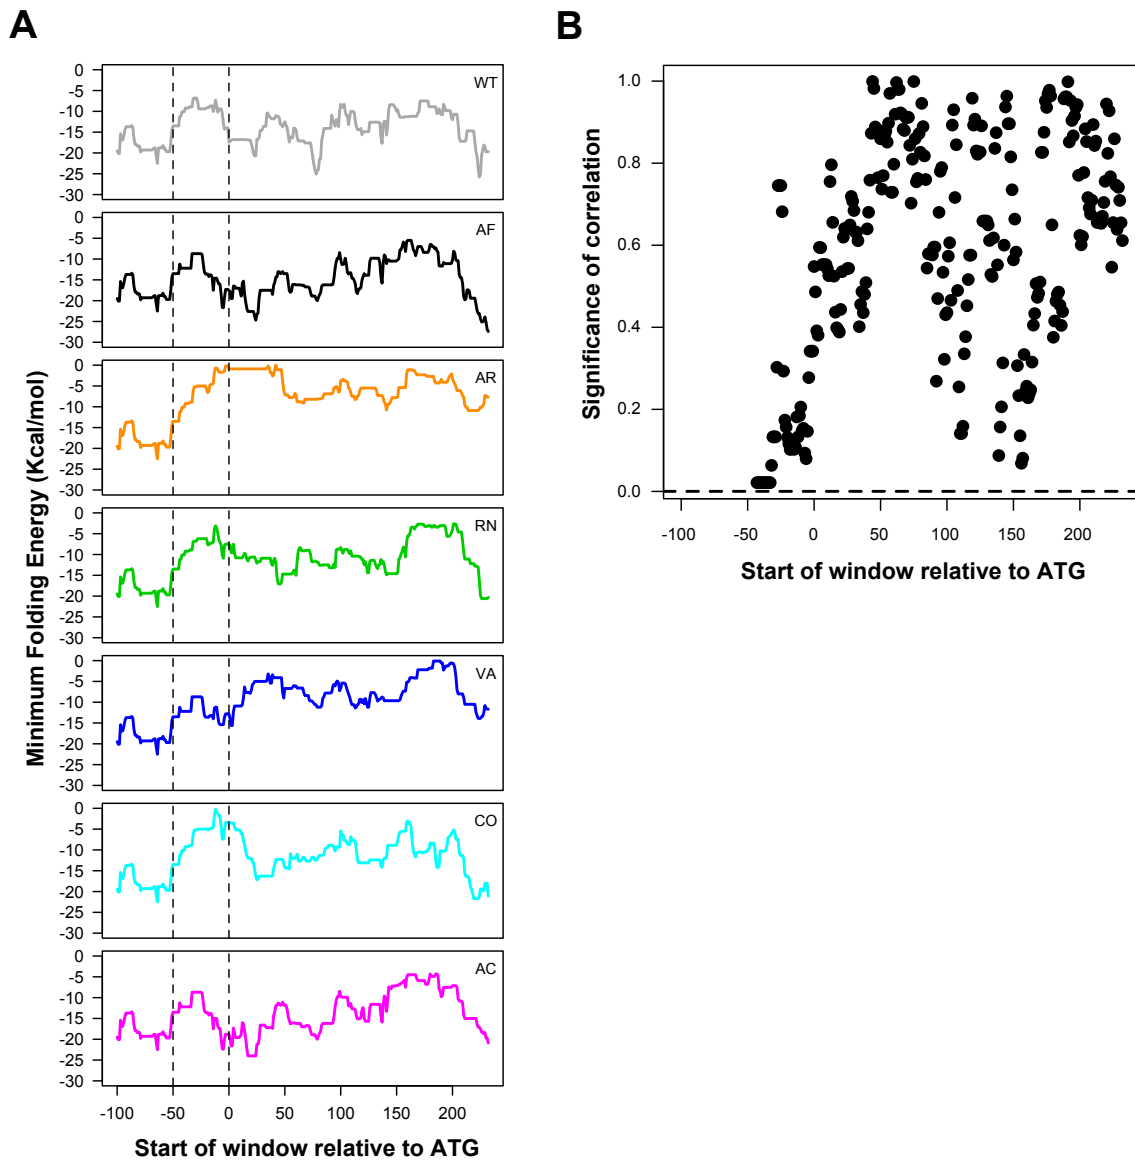

**Figure S4:** Local tAI for each codon as a function of distance from the start codon, for each *fae* allele. No 5' “ramp” of low tAI codons is observed for any allele.

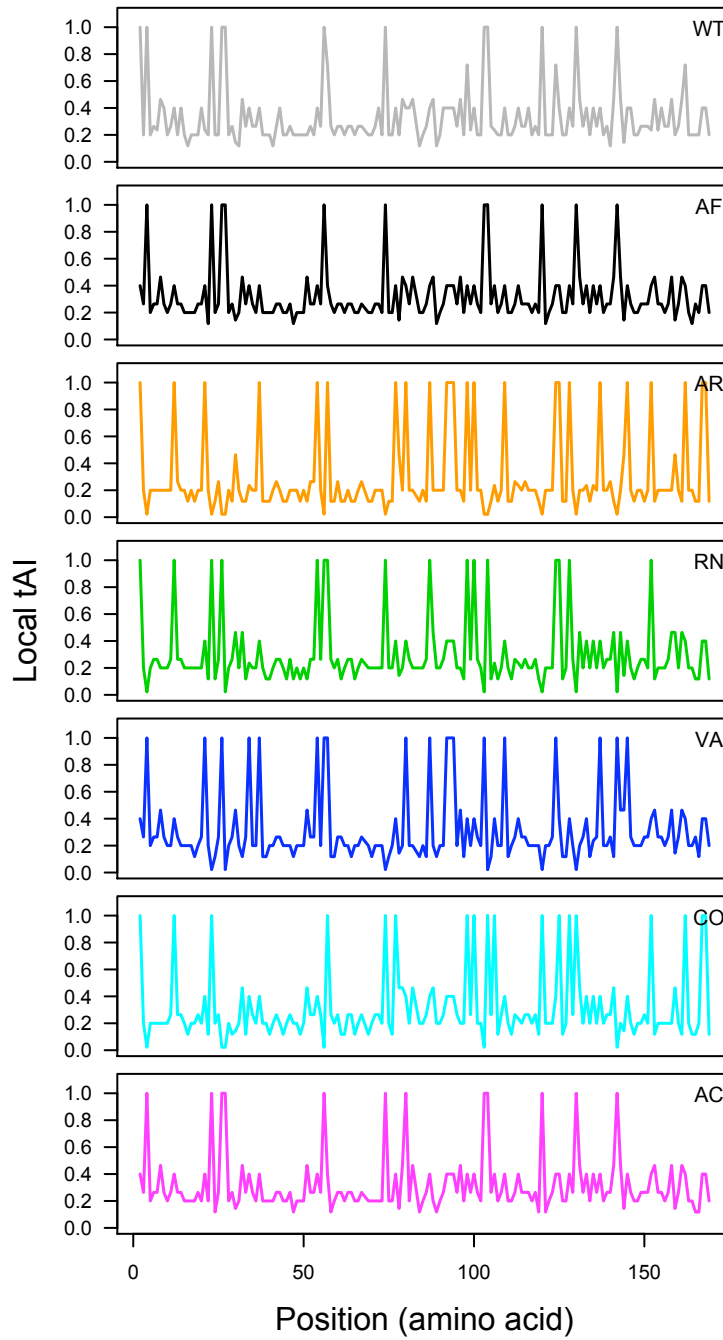

**Figure S5:** FAE protein production in each *fae* mutant, as a function of the number of hexamers GAAGAA and TGGCCA.

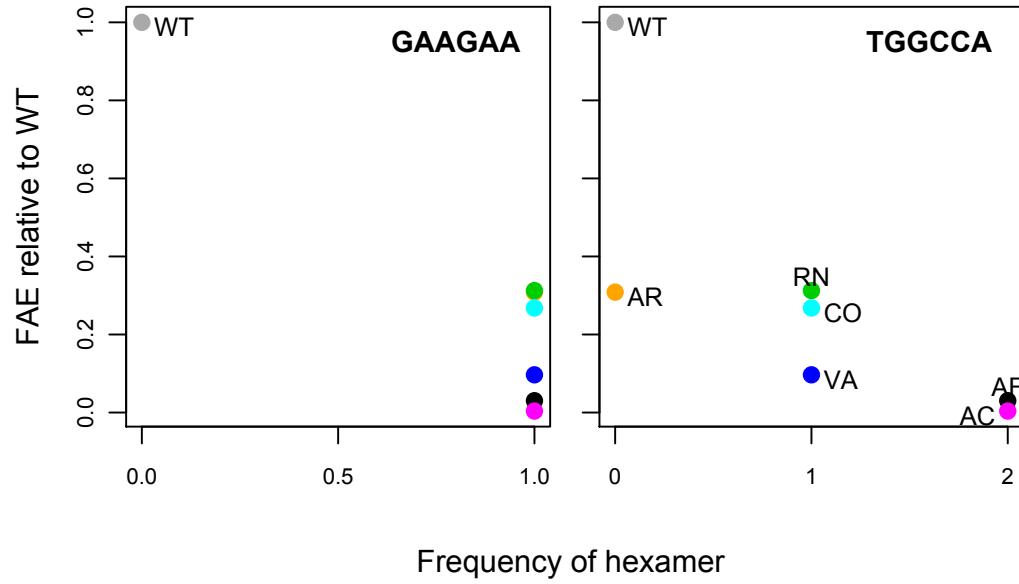

**Figure S6:** Soluble and insoluble FAE fractions in mutant strains as seen in Western Blots.

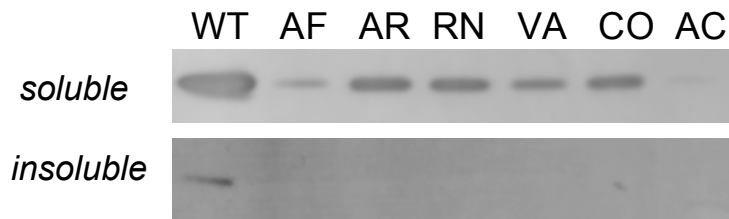

**Figure S7:** The relationship between isoaccepting tRNA fractions and codon fractions for 12 amino acids with two or more isoaccepting tRNAs, calculated as in Qian et al 2012 [18]. For amino acids with at least three codons, best fit regression lines are shown; for amino acids with only two codons, lines simply connect the two points. A positive correlation indicates that relative codon usage is proportional to tRNA availability. Grey points and lines show wild type *fae* (WT); orange points and lines indicate the mutant with only rare codons (AR), and black points and dotted black lines indicate the mutant with only frequent codons (AF).

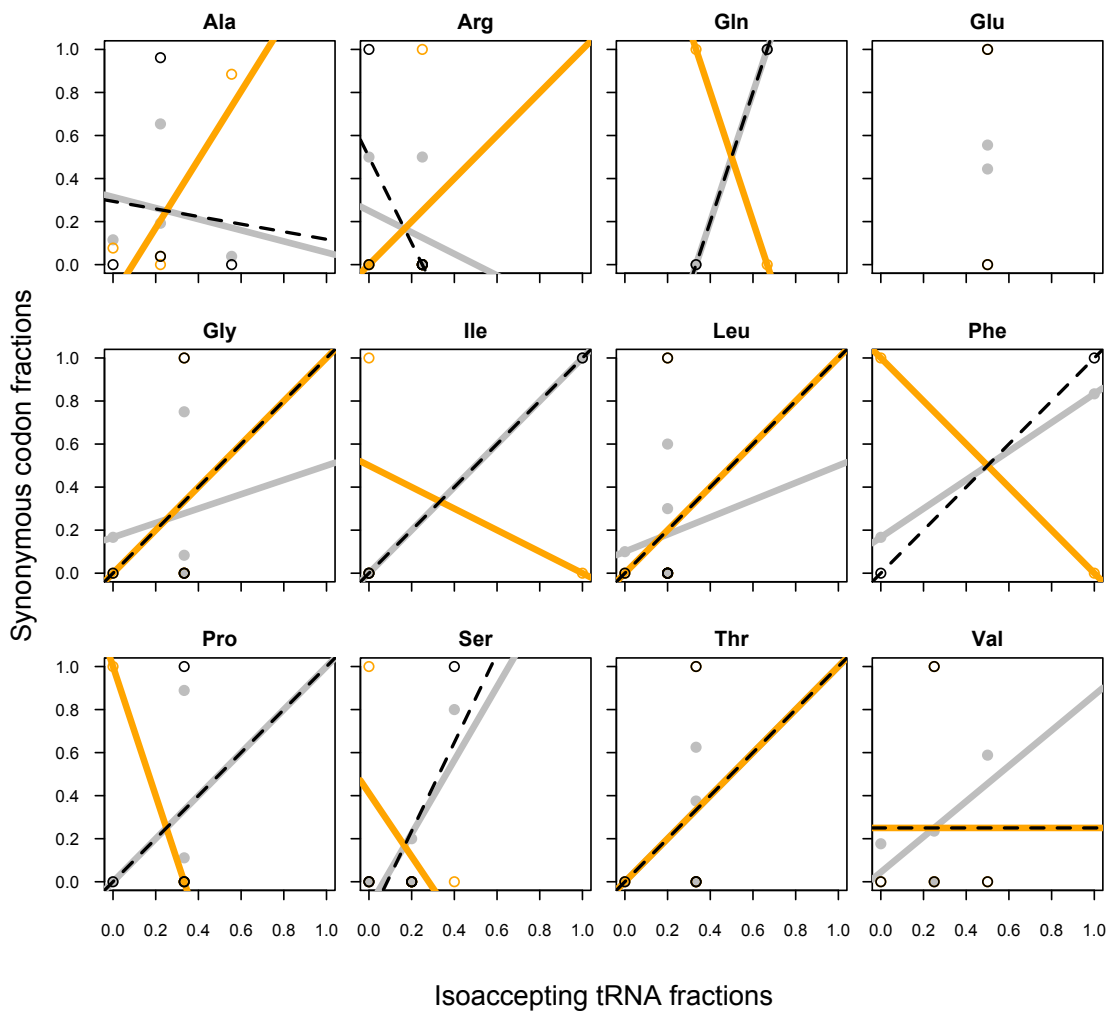

Supplement: supp_mss273_Agashe_et_al_SI_Figures.pdf [file supp_mss273_Agashe_et_al_SI_Figures.pdf]
