# Supplementary material for: Good Codons, Bad Transcript: Large Reductions in Gene Expression and Fitness Arising from Synonymous Mutations in a Key Enzyme
Source: PubMed Central journal article supplement — Mol Biol Evol. 2012 Dec 4;30(3):549–60. doi: 10.1093/molbev/mss273 (PMC3563975; doi:10.1093/molbev/mss273), 2012-12-04
Supplement: supp_mss273_Agashe_et_al_SI_Tables.pdf [file supp_mss273_Agashe_et_al_SI_Tables.pdf]

## SUPPLEMENTARY TABLES

**Table S1:** Predicted positive (+) and negative (-) effects of codon usage, based on different mechanistic hypotheses for selection on codon use

| Target of selection                                                          | Impact of codon identity (effect on protein cost vs. benefit)                                                                                                                           | Effect of % rare codons | Importance of codon position                    | Effect of high expression on fitness |
|------------------------------------------------------------------------------|-----------------------------------------------------------------------------------------------------------------------------------------------------------------------------------------|-------------------------|-------------------------------------------------|--------------------------------------|
| mRNA structure / sequence                                                    | 1. Inhibits translation initiation (insufficient benefit)                                                                                                                               | No general prediction   | 5' end most sensitive                           | +                                    |
|                                                                              | 2. Promotes rapid degradation (insufficient benefit)                                                                                                                                    | No general prediction   | No general prediction                           | +                                    |
|                                                                              | 3. Binds ribosomes (insufficient benefit and excess cost)                                                                                                                               | No general prediction   | Affinity to anti-SD                             | + (gene)<br>- (global)               |
| Ribosomal pausing during translation of rare codons (due to tRNA limitation) | 4. Slows translation & decreases protein (insufficient benefit)                                                                                                                         | -                       | No general prediction                           | +                                    |
|                                                                              | 5. Sequesters ribosomes (excess cost)                                                                                                                                                   | -                       | Rare codons good at 5' end                      | -                                    |
|                                                                              | 6. Promotes accurate protein folding. Lack of ribosome pause leads to:<br>(a) Low protein activity or stability (insufficient benefit)<br>(b) Misfolding-induced toxicity (excess cost) | No general prediction   | Rare codons preferred at domain boundaries      | +                                    |
| tRNA limitation)                                                             | 7. Increases translation errors causing:<br>(a) Low protein activity or stability (insufficient benefit)<br>(b) Misfolding-induced toxicity (excess cost)                               | -<br><br>-              | Rare codons bad at conserved or active residues | +                                    |

**Table S2:** List of frequently and rarely used codons at conserved sites, for each amino acid across all *M. extorquens* AM1 protein coding genes. Conserved amino acid residues were identified from a gene-by-gene direct comparison of coding sequences with the closely related strain *M. extorquens* DM4. For each amino acid, the z score of a codon is a measure of its association with conserved rather than variable residues ( $z_{\text{codon}} = [\text{frequency of codon at conserved sites} - \text{average frequency of codons at conserved sites}] / \text{standard deviation in the frequency of codons at conserved sites}$ ); the p value shows the significance of the association; and the odds ratio indicates the odds of the association. For each amino acid, the codon most enriched at conserved residues (most frequent) is shown in bold and the most rarely used codon is shaded light gray. Other codons are found at intermediate frequencies within conserved sites across the genome and were disregarded while designing our synonymous alleles.

| Amino acid | Codon      | z score | p value  | odds ratio | ln (odds ratio) |
|------------|------------|---------|----------|------------|-----------------|
| A          | GCA        | -5.43   | 2.78E-08 | 0.72       | -0.33           |
| A          | GCT        | -3.33   | 4.33E-04 | 0.81       | -0.21           |
| A          | GCG        | -2.01   | 2.23E-02 | 0.94       | -0.06           |
| A          | <b>GCC</b> | 5.60    | 1.06E-08 | 1.17       | 0.16            |
| C          | TGT        | -1.39   | 8.26E-02 | 0.68       | -0.38           |
| C          | <b>TGC</b> | 1.39    | 8.26E-02 | 1.47       | 0.38            |
| D          | GAT        | -0.99   | 1.60E-01 | 0.95       | -0.05           |
| D          | <b>GAC</b> | 0.99    | 1.60E-01 | 1.05       | 0.05            |
| E          | GAA        | -4.09   | 2.19E-05 | 0.79       | -0.24           |
| E          | <b>GAG</b> | 4.09    | 2.19E-05 | 1.27       | 0.24            |
| F          | TTT        | -4.91   | 4.64E-07 | 0.57       | -0.55           |
| F          | <b>TTC</b> | 4.91    | 4.64E-07 | 1.74       | 0.55            |
| G          | GGA        | -4.30   | 8.53E-06 | 0.72       | -0.33           |
| G          | GGG        | -3.74   | 9.10E-05 | 0.83       | -0.19           |
| G          | GGT        | -2.36   | 9.04E-03 | 0.84       | -0.17           |
| G          | <b>GGC</b> | 6.73    | 8.63E-12 | 1.34       | 0.29            |
| H          | CAC        | -0.62   | 2.67E-01 | 0.94       | -0.06           |
| H          | <b>CAT</b> | 0.62    | 2.67E-01 | 1.06       | 0.06            |
| I          | ATA        | -9.79   | 6.05E-23 | 0.17       | -1.80           |
| I          | ATT        | -3.47   | 2.65E-04 | 0.70       | -0.36           |
| I          | <b>ATC</b> | 6.90    | 2.69E-12 | 1.87       | 0.63            |
| K          | AAA        | -5.68   | 6.61E-09 | 0.53       | -0.64           |
| K          | <b>AAG</b> | 5.68    | 6.61E-09 | 1.89       | 0.64            |

|   |            |        |           |      |       |
|---|------------|--------|-----------|------|-------|
| L | <b>TTG</b> | -8.01  | 5.90E-16  | 0.57 | -0.56 |
| L | CTA        | -2.45  | 7.15E-03  | 0.67 | -0.40 |
| L | CTT        | -4.71  | 1.23E-06  | 0.70 | -0.36 |
| L | TTA        | -0.55  | 2.92E-01  | 0.84 | -0.17 |
| L | CTC        | 2.01   | 2.21E-02  | 1.08 | 0.08  |
| L | <b>CTG</b> | 4.26   | 1.04E-05  | 1.18 | 0.17  |
| N | <b>AAT</b> | -1.53  | 6.25E-02  | 0.85 | -0.17 |
| N | <b>AAC</b> | 1.53   | 6.25E-02  | 1.18 | 0.17  |
| P | <b>CCT</b> | -5.22  | 8.73E-08  | 0.58 | -0.54 |
| P | CCA        | -3.03  | 1.21E-03  | 0.69 | -0.37 |
| P | CCC        | -4.22  | 1.25E-05  | 0.81 | -0.21 |
| P | <b>CCG</b> | 7.16   | 4.09E-13  | 1.40 | 0.34  |
| Q | <b>CAA</b> | -4.29  | 9.11E-06  | 0.68 | -0.38 |
| Q | <b>CAG</b> | 4.29   | 9.11E-06  | 1.47 | 0.38  |
| R | AGG        | -23.13 | 1.27E-118 | 0.18 | -1.69 |
| R | <b>AGA</b> | -10.14 | 1.86E-24  | 0.22 | -1.51 |
| R | CGA        | -3.29  | 4.99E-04  | 0.72 | -0.33 |
| R | CGT        | -3.40  | 3.41E-04  | 0.77 | -0.27 |
| R | CGG        | 1.32   | 9.26E-02  | 1.06 | 0.06  |
| R | <b>CGC</b> | 10.93  | 4.03E-28  | 1.59 | 0.47  |
| S | <b>AGT</b> | -7.17  | 3.70E-13  | 0.48 | -0.73 |
| S | TCT        | -5.77  | 3.90E-09  | 0.50 | -0.69 |
| S | TCA        | -1.81  | 3.51E-02  | 0.80 | -0.23 |
| S | TCC        | -2.52  | 5.91E-03  | 0.89 | -0.12 |
| S | AGC        | -1.70  | 4.44E-02  | 0.93 | -0.08 |
| S | <b>TCG</b> | 8.76   | 9.74E-19  | 1.51 | 0.41  |
| T | <b>ACA</b> | -7.32  | 1.26E-13  | 0.49 | -0.72 |
| T | ACT        | -5.42  | 2.98E-08  | 0.55 | -0.60 |
| T | ACG        | -1.18  | 1.18E-01  | 0.95 | -0.05 |
| T | <b>ACC</b> | 5.52   | 1.72E-08  | 1.27 | 0.24  |
| V | <b>GTA</b> | -2.20  | 1.38E-02  | 0.73 | -0.31 |
| V | GTT        | -3.44  | 2.96E-04  | 0.76 | -0.28 |
| V | GTC        | -2.72  | 3.26E-03  | 0.90 | -0.11 |
| V | <b>GTG</b> | 4.85   | 6.21E-07  | 1.22 | 0.20  |
| Y | <b>TAT</b> | -1.80  | 3.58E-02  | 0.80 | -0.22 |
| Y | <b>TAC</b> | 1.80   | 3.58E-02  | 1.25 | 0.22  |

**Table S3:** Coding sequences of *fae* mutants with C-terminal FLAG epitope tag.

| Key                                                |                           |
|----------------------------------------------------|---------------------------|
| conserved residue                                  | FLAG epitope tag          |
| variable residue                                   | rare codon                |
| residue assigned randomly as conserved or variable | frequent codon            |
| residue added / nucleotides changed for cloning    | Codon changed for cloning |

| Position | Amino Acid | WT* | WT  | AF  | AR  | RN  | VA  | CO  | AC  |
|----------|------------|-----|-----|-----|-----|-----|-----|-----|-----|
| "-1"     | -          | CGA | CAT |
| 1        | M          | ATG |
| 2        | A          | GCA | GCA | GCC | GCA | GCA | GCC | GCA | GCC |
| 3        | K          | AAA | AAA | AAG | AAA | AAA | AAG | AAA | AAG |
| 4        | I          | ATC | ATC | ATC | ATA | ATA | ATC | ATA | ATC |
| 5        | T          | ACC | ACC | ACC | ACA | ACC | ACC | ACA | ACC |
| 6        | K          | AAG | AAG | AAG | AAA | AAG | AAG | AAA | AAG |
| 7        | V          | GTT | GTT | GTG | GTA | GTG | GTG | GTA | GTG |
| 8        | Q          | CAG | CAG | CAG | CAA | CAA | CAG | CAA | CAG |
| 9        | V          | GTC | GTC | GTG | GTA | GTA | GTG | GTA | GTG |
| 10       | G          | GGC | GGC | GGC | GGA | GGC | GGA | GGC | GGC |
| 11       | E          | GAG | GAG | GAG | GAA | GAG | GAA | GAG | GAG |
| 12       | A          | GCC | GCC | GCC | GCA | GCA | GCC | GCA | GCC |
| 13       | L          | CTC | CTC | CTG | TTG | TTG | TTG | CTG | TTG |
| 14       | V          | GTC | GTC | GTG | GTA | GTG | GTA | GTG | GTG |
| 15       | G          | GGC | GGC | GGC | GGA | GGA | GGA | GGC | GGC |
| 16       | D          | GAT | GAT | GAC | GAT | GAC | GAC | GAT | GAC |
| 17       | G          | GGC | GGC | GGC | GGA | GGC | GGC | GGA | GGC |
| 18       | N          | AAC | AAC | AAC | AAT | AAC | AAT | AAC | AAC |
| 19       | E          | GAA | GAA | GAG | GAA | GAA | GAA | GAG | GAG |
| 20       | V          | GTC | GTC | GTG | GTA | GTA | GTG | GTA | GTA |
| 21       | A          | GCT | GCT | GCC | GCA | GCC | GCA | GCC | GCC |
| 22       | H          | CAC | CAC | CAT | CAC | CAT | CAC | CAT | CAC |
| 23       | I          | ATC | ATC | ATC | ATA | ATC | ATA | ATC | ATC |
| 24       | D          | GAC | GAC | GAC | GAT | GAT | GAT | GAC | GAT |
| 25       | L          | CTC | CTC | CTG | TTG | CTG | TTG | CTG | CTG |
| 26       | I          | ATC | ATC | ATC | ATA | ATC | ATC | ATA | ATC |
| 27       | I          | ATC | ATC | ATC | ATA | ATA | ATA | ATA | ATC |
| 28       | G          | GGA | GGA | GGC | GGA | GGA | GGA | GGC | GGC |
| 29       | P          | CCG | CCG | CCG | CCT | CCG | CCG | CCT | CCG |
| 30       | R          | CGC | CGC | CGC | AGG | AGG | AGG | CGC | CGC |
| 31       | G          | GGT | GGT | GGC | GGA | GGC | GGC | GGA | GGC |
| 32       | S          | TCG | TCG | TCG | AGT | TCG | AGT | TCG | TCG |
| 33       | P          | CCG | CCG | CCG | CCT | CCT | CCG | CCT | CCG |
| 34       | A          | GCC | GCC | GCC | GCT | GCT | GCA | GCC | GCC |
| 35       | E          | GAG | GAG | GAG | GAA | GAA | GAA | GAG | GAG |
| 36       | T          | ACG | ACG | ACC | ACA | ACA | ACC | ACA | ACC |
| 37       | A          | GCC | GCC | GCC | GCA | GCC | GCA | GCC | GCC |
| 38       | F          | TTC | TTC | TTC | TTT | TTC | TTT | TTC | TTC |

|    |   |     |     |     |     |     |     |     |     |
|----|---|-----|-----|-----|-----|-----|-----|-----|-----|
| 39 | C | TGC | TGC | TGC | TGT | TGT | TGT | TGC | TGC |
| 40 | N | AAC | AAC | AAC | AAT | AAT | AAC | AAT | AAC |
| 41 | G | GGT | GGT | GGC | GGA | GGC | GGC | GGA | GGC |
| 42 | L | CTG | CTG | CTG | TTG | TTG | TTG | CTG | CTG |
| 43 | V | GTC | GTC | GTG | GTA | GTG | GTG | GTA | GTG |
| 44 | N | AAC | AAC | AAC | AAT | AAC | AAC | AAT | AAC |
| 45 | N | AAC | AAC | AAC | AAT | AAT | AAC | AAC | AAC |
| 46 | K | AAG | AAG | AAG | AAA | AAG | AAA | AAG | AAG |
| 47 | H | CAC | CAC | CAT | CAC | CAT | CAT | CAC | CAT |
| 48 | G | GGC | GGC | GGC | GGA | GGC | GGA | GGC | GGC |
| 49 | F | TTC | TTC | TTC | TTT | TTT | TTC | TTT | TTC |
| 50 | T | ACC | ACC | ACC | ACA | ACC | ACA | ACC | ACA |
| 51 | S | AGC | AGC | TCG | AGT | AGT | TCG | TCG | TCG |
| 52 | L | CTG | CTG | CTG | TTG | TTG | TTG | CTG | TTG |
| 53 | L | CTC | CTC | CTG | TTG | TTG | TTG | CTG | TTG |
| 54 | A | GCC | GCC | GCC | GCA | GCA | GCA | GCC | GCC |
| 55 | V | GTG | GTG | GTG | GTA | GTG | GTA | GTG | GTG |
| 56 | I | ATC | ATC | ATC | ATA | ATC | ATC | ATA | ATC |
| 57 | A | GCG | GCG | GCC | GCA | GCA | GCA | GCA | GCC |
| 58 | P | CCG | CCG | CCG | CCT | CCG | CCT | CCG | CCT |
| 59 | N | AAC | AAC | AAC | AAT | AAC | AAT | AAC | AAC |
| 60 | L | CTG | CTG | CTG | TTG | CTG | CTG | TTG | CTG |
| 61 | P | CCG | CCG | CCG | CCT | CCT | CCG | CCT | CCG |
| 62 | C | TGC | TGC | TGC | TGT | TGC | TGC | TGT | TGC |
| 63 | K | AAG | AAG | AAG | AAA | AAG | AAA | AAG | AAG |
| 64 | P | CCG | CCG | CCG | CCT | CCG | CCT | CCG | CCG |
| 65 | N | AAC | AAC | AAC | AAT | AAT | AAC | AAT | AAC |
| 66 | T | ACG | ACG | ACC | ACA | ACA | ACA | ACC | ACC |
| 67 | L | CTG | CTG | CTG | TTG | TTG | CTG | TTG | CTG |
| 68 | M | ATG |
| 69 | F | TTC | TTC | TTC | TTT | TTC | TTC | TTT | TTC |
| 70 | N | AAC | AAC | AAC | AAT | AAC | AAT | AAC | AAC |
| 71 | K | AAG | AAG | AAG | AAA | AAA | AAA | AAG | AAA |
| 72 | V | GTC | GTC | GTG | GTA | GTA | GTA | GTG | GTA |
| 73 | T | ACC | ACC | ACC | ACA | ACC | ACA | ACC | ACC |
| 74 | I | ATC | ATC | ATC | ATA | ATC | ATA | ATC | ATC |
| 75 | N | AAC | AAC | AAC | AAT | AAC | AAT | AAC | AAC |
| 76 | D | GAC | GAC | GAC | GAT | GAC | GAC | GAT | GAC |
| 77 | A | GCC | GCC | GCC | GCA | GCC | GCC | GCA | GCC |
| 78 | R | CGT | CGT | CGC | AGG | CGC | CGC | AGG | CGC |
| 79 | Q | CAG | CAG | CAG | CAA | CAA | CAA | CAG | CAG |
| 80 | A | GCC | GCC | GCC | GCA | GCC | GCA | GCC | GCA |
| 81 | V | GTC | GTC | GTG | GTA | GTG | GTA | GTA | GTA |
| 82 | Q | CAG | CAG | CAG | CAA | CAA | CAA | CAG | CAG |
| 83 | M | ATG |
| 84 | F | TTT | TTT | TTC | TTT | TTC | TTT | TTC | TTT |
| 85 | G | GGC | GGC | GGC | GGA | GGA | GGA | GGC | GGC |
| 86 | P | CCG | CCG | CCG | CCT | CCG | CCT | CCG | CCG |
| 87 | A | GCC | GCC | GCC | GCA | GCA | GCA | GCC | GCC |
| 88 | Q | CAG | CAG | CAG | CAA | CAG | CAA | CAG | CAA |

|     |   |     |     |     |     |     |     |     |     |
|-----|---|-----|-----|-----|-----|-----|-----|-----|-----|
| 89  | H | CAT | CAT | CAT | CAC | CAC | CAT | CAC | CAT |
| 90  | G | GGC | GGC | GGC | GGA | GGA | GGC | GGA | GGC |
| 91  | V | GTC | GTC | GTG | GTA | GTG | GTA | GTG | GTG |
| 92  | A | GCC | GCC | GCC | GCA | GCC | GCA | GCC | GCC |
| 93  | M | ATG |
| 94  | A | GCC | GCC | GCC | GCA | GCC | GCA | GCC | GCC |
| 95  | V | GTG | GTG | GTG | GTA | GTA | GTA | GTG | GTG |
| 96  | Q | CAG | CAG | CAG | CAA | CAA | CAG | CAA | CAG |
| 97  | D | GAC | GAC | GAC | GAT | GAT | GAT | GAC | GAC |
| 98  | A | GCG | GCG | GCC | GCA | GCA | GCC | GCA | GCC |
| 99  | V | GTT | GTT | GTG | GTA | GTG | GTA | GTG | GTG |
| 100 | A | GCC | GCC | GCC | GCA | GCA | GCC | GCA | GCC |
| 101 | E | GAA | GAA | GAG | GAA | GAG | GAG | GAA | GAG |
| 102 | G | GGC | GGC | GGC | GGA | GGC | GGA | GGC | GGC |
| 103 | I | ATC | ATC | ATC | ATA | ATA | ATC | ATA | ATC |
| 104 | I | ATC | ATC | ATC | ATA | ATC | ATA | ATC | ATC |
| 105 | P | CCG | CCG | CCG | CCT | CCT | CCT | CCG | CCG |
| 106 | A | GCT | GCT | GCC | GCT | GCT | GCC | GCA | GCC |
| 107 | D | GAC | GAC | GAC | GAT | GAT | GAC | GAT | GAC |
| 108 | E | GAA | GAA | GAG | GAA | GAA | GAA | GAG | GAG |
| 109 | A | GCC | GCC | GCC | GCA | GCC | GCA | GCC | GCC |
| 110 | D | GAC | GAC | GAC | GAT | GAC | GAT | GAC | GAC |
| 111 | D | GAC | GAC | GAC | GAT | GAT | GAC | GAT | GAC |
| 112 | L | CTG | CTG | CTG | TTG | CTG | CTG | TTG | CTG |
| 113 | Y | TAC | TAC | TAC | TAT | TAT | TAC | TAT | TAC |
| 114 | V | GTG | GTG | GTG | GTA | GTA | GTG | GTA | GTG |
| 115 | L | CTG | CTG | CTG | TTG | CTG | CTG | TTG | CTG |
| 116 | V | GTC | GTC | GTG | GTA | GTA | GTA | GTG | GTG |
| 117 | G | GGC | GGC | GGC | GGA | GGA | GGC | GGA | GGC |
| 118 | V | GTG | GTG | GTG | GTA | GTG | GTA | GTG | GTG |
| 119 | F | TTC | TTC | TTC | TTT | TTT | TTC | TTT | TTT |
| 120 | I | ATC | ATC | ATC | ATA | ATA | ATA | ATC | ATC |
| 121 | H | CAC | CAC | CAT | CAC | CAC | CAC | CAC | CAT |
| 122 | W | TGG |
| 123 | E | GAA | GAA | GAG | GAA | GAA | GAG | GAA | GAG |
| 124 | A | GCG | GCG | GCC | GCA | GCA | GCA | GCC | GCC |
| 125 | A | GCC | GCC | GCC | GCA | GCA | GCC | GCA | GCC |
| 126 | D | GAC | GAC | GAC | GAT | GAT | GAT | GAT | GAC |
| 127 | D | GAC | GAC | GAC | GAT | GAC | GAT | GAC | GAC |
| 128 | A | GCC | GCC | GCC | GCA | GCA | GCC | GCA | GCC |
| 129 | K | AAG | AAG | AAG | AAA | AAG | AAA | AAG | AAG |
| 130 | I | ATC | ATC | ATC | ATA | ATA | ATA | ATC | ATC |
| 131 | Q | CAG | CAG | CAG | CAA | CAG | CAA | CAG | CAG |
| 132 | K | AAG | AAG | AAG | AAA | AAA | AAG | AAA | AAG |
| 133 | Y | TAC | TAC | TAC | TAT | TAC | TAC | TAC | TAC |
| 134 | N | AAC | AAC | AAC | AAT | AAC | AAT | AAC | AAC |
| 135 | Y | TAC | TAC | TAC | TAT | TAC | TAT | TAC | TAC |
| 136 | E | GAG | GAG | GAG | GAA | GAA | GAG | GAA | GAG |
| 137 | A | GCC | GCC | GCC | GCA | GCC | GCA | GCC | GCC |
| 138 | T | ACC | ACC | ACC | ACA | ACA | ACA | ACC | ACC |

|     |          |     |     |     |     |     |     |     |     |
|-----|----------|-----|-----|-----|-----|-----|-----|-----|-----|
| 139 | K        | AAG | AAG | AAG | AAA | AAG | AAA | AAG | AAG |
| 140 | L        | CTT | CTT | CTG | TTG | CTG | CTG | TTG | CTG |
| 141 | S        | TCG | TCG | TCG | AGT | TCG | AGT | TCG | TCG |
| 142 | I        | ATC | ATC | ATC | ATA | ATA | ATC | ATA | ATC |
| 143 | Q        | CAG | CAG | CAG | CAA | CAG | CAG | CAA | CAG |
| 144 | R        | CGC | CGC | CGC | AGG | CGC | AGG | CGC | CGC |
| 145 | A        | GCC | GCC | GCC | GCA | GCC | GCA | GCC | GCC |
| 146 | V        | GTC | GTC | GTG | GTA | GTA | GTG | GTA | GTG |
| 147 | N        | AAC | AAC | AAC | AAT | AAT | AAC | AAT | AAC |
| 148 | G        | GGC | GGC | GGC | GGA | GGA | GGC | GGA | GGC |
| 149 | E        | GAG | GAG | GAG | GAA | GAG | GAA | GAA | GAG |
| 150 | P        | CCG | CCG | CCG | CCT | CCG | CCG | CCG | CCG |
| 151 | K        | AAG | AAG | AAG | AAA | AAA | AAG | AAA | AAG |
| 152 | A        | GCT | GCT | GCC | GCA | GCA | GCC | GCA | GCC |
| 153 | S        | TCG | TCG | TCG | AGT | AGT | TCG | AGT | TCG |
| 154 | V        | GTT | GTT | GTG | GTA | GTA | GTG | GTA | GTG |
| 155 | V        | GTC | GTC | GTG | GTA | GTA | GTG | GTA | GTG |
| 156 | T        | ACG | ACG | ACC | ACA | ACA | ACC | ACA | ACC |
| 157 | E        | GAG | GAG | GAG | GAA | GAG | GAG | GAA | GAG |
| 158 | Q        | CAG | CAG | CAG | CAA | CAG | CAG | CAA | CAG |
| 159 | R        | CGT | CGT | CGC | AGG | AGG | CGC | AGG | CGC |
| 160 | K        | AAG | AAG | AAG | AAA | AAA | AAG | AAA | AAG |
| 161 | S        | TCG | TCG | TCG | AGT | TCG | TCG | AGT | TCG |
| 162 | A        | GCG | GCG | GCC | GCA | GCC | GCC | GCA | GCC |
| 163 | T        | ACC | ACC | ACC | ACA | ACC | ACC | ACA | ACC |
| 164 | H        | CAC | CAC | CAT | CAC | CAC | CAC | CAT | CAC |
| 165 | P        | CCC | CCC | CCG | CCT | CCT | CCG | CCT | CCT |
| 166 | F        | TTC | TTC | TTC | TTT | TTT | TTT | TTC | TTT |
| 167 | A        | GCC | GCC | GCC | GCA | GCC | GCC | GCA | GCC |
| 168 | A        | GCC | GCC | GCC | GCA | GCC | GCC | GCA | GCC |
| 169 | N        | AAC | AAC | AAC | AAT | AAT | AAC | AAT | AAC |
| 170 | A        | GCT | GCG |
| 171 | A        | GCC |
| 172 | A        | -   | GCA |
| 173 | R        | -   | CGC |
| 174 | V        | -   | GTG |
| 175 | <u>D</u> | -   | GAC |
| 176 | <u>Y</u> | -   | TAC |
| 177 | <u>K</u> | -   | AAG |
| 178 | <u>D</u> | -   | GAC |
| 179 | <u>D</u> | -   | GAT |
| 180 | <u>D</u> | -   | GAC |
| 181 | <u>D</u> | -   | GAT |
| 182 | <u>K</u> | -   | AAG |
| 183 | A        | -   | GCG |
| 184 | A        | -   | GCC |
| 185 | A        | -   | GCG |
| 186 | STOP     | TAG |

**Table S4:** Primers used in this study. Sequence added for cloning is shown in italics.

| Primer        | Sequence (5'→ 3')                                                                            | Restriction sites/features                                  |
|---------------|----------------------------------------------------------------------------------------------|-------------------------------------------------------------|
| CM_syn_fae0-f | <i>ACTGCAGCGCATATGG</i> CAAAAATCACCAAGGTTTCAGGTC                                             | <i>Pst</i> I, <i>Nde</i> I, <b>Start codon</b>              |
| CM_syn_fae0-r | <i>GACGCGTGGCGCCGGC</i> GTTGGCGGCGAAGGGGTG                                                   | <i>Mlu</i> I, <i>Nde</i> I                                  |
| CM_syn_fae-uf | <i>AGCTAGCACATCGCCCGCAAGCAC</i>                                                              | <i>Nhe</i> I                                                |
| CM_syn_fae-ur | <i>TGGGCCCTGCAGCCTTGTTCATCGTCATCCTTGTAGTCCA</i><br><i>TATGGGGTCTCTCCCTGGATTCTCTG</i>         | <i>Apa</i> I, <i>Pst</i> I                                  |
| CM_syn_fae-df | <i>AGGGCCCACGCGTGGACTACAAGGACGATGACGATAAG</i><br><i>GCGGCCCGGTAG</i> ATCGGAGGCAGTCCTGGGCAGAG | <i>Apa</i> I, <i>Nde</i> I, <i>Mlu</i> I, <b>Stop codon</b> |
| CM_syn_fae-dr | <i>CACCGGTCAGTCGGATGCGGATCTCGTG</i>                                                          | <i>Age</i> I                                                |
| DA_p51_f      | <i>ATTAAGATCTAGGGAGAGACCCCATATGG</i>                                                         | <i>Bgl</i> II, <b>Start codon</b>                           |
| DA_p43_r      | <i>ATTAGAATTCACGCGGCCGCTTATCGTC</i>                                                          | <i>Eco</i> RI, <b>Stop codon</b>                            |

**Table S5:** Plasmids used in this study. “up” and “down” refer to *fae* upstream and downstream regions

| Plasmid   | Features                                                                        | Reference             |
|-----------|---------------------------------------------------------------------------------|-----------------------|
| pCM433    | Allelic exchange vector; Amp <sup>R</sup> , Chl <sup>R</sup> , Tet <sup>R</sup> | Marx 2008             |
| pDAFu0d   | pCM433:: <i>fae</i> -up:: <i>fae</i> <sup>WT</sup> :: <i>fae</i> -down          | This study            |
| pDAFu1d   | pCM433:: <i>fae</i> -up:: <i>fae</i> <sup>AF</sup> :: <i>fae</i> -down          | This study            |
| pDAFu2d   | pCM433:: <i>fae</i> -up:: <i>fae</i> <sup>AR</sup> :: <i>fae</i> -down          | This study            |
| pDAFu3d   | pCM433:: <i>fae</i> -up:: <i>fae</i> <sup>RN</sup> :: <i>fae</i> -down          | This study            |
| pDAFu4d   | pCM433:: <i>fae</i> -up:: <i>fae</i> <sup>VA</sup> :: <i>fae</i> -down          | This study            |
| pDAFu5d   | pCM433:: <i>fae</i> -up:: <i>fae</i> <sup>CO</sup> :: <i>fae</i> -down          | This study            |
| pDAFu6d   | pCM433:: <i>fae</i> -up:: <i>fae</i> <sup>AC</sup> :: <i>fae</i> -down          | This study            |
| pDAF0     | pDAFu0d without N-terminal FLAG tag                                             | This study            |
| pDAF1     | pDAFu1d without N-terminal FLAG tag                                             | This study            |
| pDAF2     | pDAFu2d without N-terminal FLAG tag                                             | This study            |
| pDAF3     | pDAFu3d without N-terminal FLAG tag                                             | This study            |
| pDAF4     | pDAFu4d without N-terminal FLAG tag                                             | This study            |
| pDAF5     | pDAFu5d without N-terminal FLAG tag                                             | This study            |
| pDAF6     | pDAFu6d without N-terminal FLAG tag                                             | This study            |
| pHC115    | Kan <sup>R</sup> , cumate regulator, <i>P</i> <sub>mxoF</sub> promoter          | Hagemeier et al. 2000 |
| pDA115-F0 | pHC115:: <i>fae</i> <sup>WT</sup>                                               | This study            |
| pDA115-F1 | pHC115:: <i>fae</i> <sup>AF</sup>                                               | This study            |
| pDA115-F2 | pHC115:: <i>fae</i> <sup>AR</sup>                                               | This study            |
| pDA115-F3 | pHC115:: <i>fae</i> <sup>RN</sup>                                               | This study            |
| pDA115-F4 | pHC115:: <i>fae</i> <sup>VA</sup>                                               | This study            |
| pDA115-F5 | pHC115:: <i>fae</i> <sup>CO</sup>                                               | This study            |
| pDA115-F6 | pHC115:: <i>fae</i> <sup>AC</sup>                                               | This study            |



**Table S6:** Strains used in this study.

| Strain | Label | Features                                                                       | Reference  |
|--------|-------|--------------------------------------------------------------------------------|------------|
| CM501  | –     | <i>Methylobacterium extorquens</i> wild-type strain                            | Marx 2008  |
| CM2720 | WT*   | CM501 variant                                                                  | This study |
| CM2721 | –     | CM1175 variant (with <i>P<sub>tacA</sub></i> -mCherry; Lee, Chou & Marx 2009)  | This study |
| CM2563 | Del   | CM2006 variant (isolate of CM198.1, Marx & Lidstrom 2002), $\Delta$ <i>fae</i> | This study |
| CM2556 | WT    | CM2563:: <i>fae</i> <sup>WT</sup>                                              | This study |
| CM2565 | AF    | CM2563:: <i>fae</i> <sup>AF</sup>                                              | This study |
| CM2558 | AR    | CM2563:: <i>fae</i> <sup>AR</sup>                                              | This study |
| CM2559 | RN    | CM2563:: <i>fae</i> <sup>RN</sup>                                              | This study |
| CM2560 | VA    | CM2563:: <i>fae</i> <sup>VA</sup>                                              | This study |
| CM2561 | CO    | CM2563:: <i>fae</i> <sup>CO</sup>                                              | This study |
| CM2562 | AC    | CM2563:: <i>fae</i> <sup>AC</sup>                                              | This study |
| CM2574 | WT    | CM2563 transformed with pDA115-F0                                              | This study |
| CM2575 | AF    | CM2563 transformed with pDA115-F1                                              | This study |
| CM2576 | AR    | CM2563 transformed with pDA115-F2                                              | This study |
| CM2577 | RN    | CM2563 transformed with pDA115-F3                                              | This study |
| CM2578 | VA    | CM2563 transformed with pDA115-F4                                              | This study |
| CM2579 | CO    | CM2563 transformed with pDA115-F5                                              | This study |
| CM2580 | AC    | CM2563 transformed with pDA115-F6                                              | This study |

**Table S7:** Primers used for quantitative real time PCR

| Gene (allele)            | Primer   | Sequence (5' → 3')       | Product length |
|--------------------------|----------|--------------------------|----------------|
| <i>rpsB</i>              | DA_p54_f | TCGGCTCAGTACTACGTCAACT   | 176 bp         |
|                          | DA_p54_r | CTTCTCGAGCTTGTCTTCTCAC   |                |
| <i>fae</i> <sup>WT</sup> | DA_p55_f | TGGCAACGAAGTCGCTCACA     | 156 bp         |
|                          | DA_p55_r | ATCAGCGTGTTCGGCTTGCA     |                |
| <i>fae</i> <sup>AF</sup> | DA_p56_f | CGGCAACGAGGTGGCCCAT      | 159 bp         |
|                          | DA_p56_r | AACATCAGGGTGTTCGGCTTGC   |                |
| <i>fae</i> <sup>AR</sup> | DA_p66f  | ACACGGATTTACAAGTTTGTGGCA | 149 bp         |
|                          | DA_p66r  | TGTACTGCCATTGCTACTCCGTG  |                |
| <i>fae</i> <sup>RN</sup> | DA_p58_f | GTTGGCAGTGATCGCACCGA     | 151 bp         |
|                          | DA_p58_r | GCCCTCTGCCACTGCATCTT     |                |
| <i>fae</i> <sup>VA</sup> | DA_p67f  | ACCAAGGTGCAGGTGGGAGA     | 159 bp         |
|                          | DA_p67r  | GTGCGATTACTGCCAACAACGA   |                |
| <i>fae</i> <sup>CO</sup> | DA_p60_f | CCTGCCGAGACAGCCTTCTG     | 152 bp         |
|                          | DA_p60_r | ATCTGTACGGCCTGCCTTGC     |                |
| <i>fae</i> <sup>AC</sup> | DA_p61_f | GACGGCAACGAGGTAGCCC      | 157 bp         |
|                          | DA_p61_r | TCAGGGTGTTCGGCTTGAC      |                |
